# Supplementary material for: A simple route to prepare free-standing graphene thin film for high-performance flexible electrode materials
Source: Royal Society of Chemistry journal article supplement (doi:10.1039/c4ra04031g), 2014-06-17
Supplement: c4ra04031g1.pdf [file c4ra04031g1.pdf]

**Supporting Information**  
**A Simple Route to Prepare Free-standing Graphene Thin Film for High-performance Flexible Electrode Materials**

Yanyun Liu, Dong Zhang\*, Yu Shang, Yong Liu

School of Material Science and Engineering, Tongji University, Caoan Road, Shanghai 200092, PR China

Corresponding author. Tel/fax: +86 21 69582144.

Email: [zhangdng@tongji.edu.cn](mailto:zhangdng@tongji.edu.cn)

1.

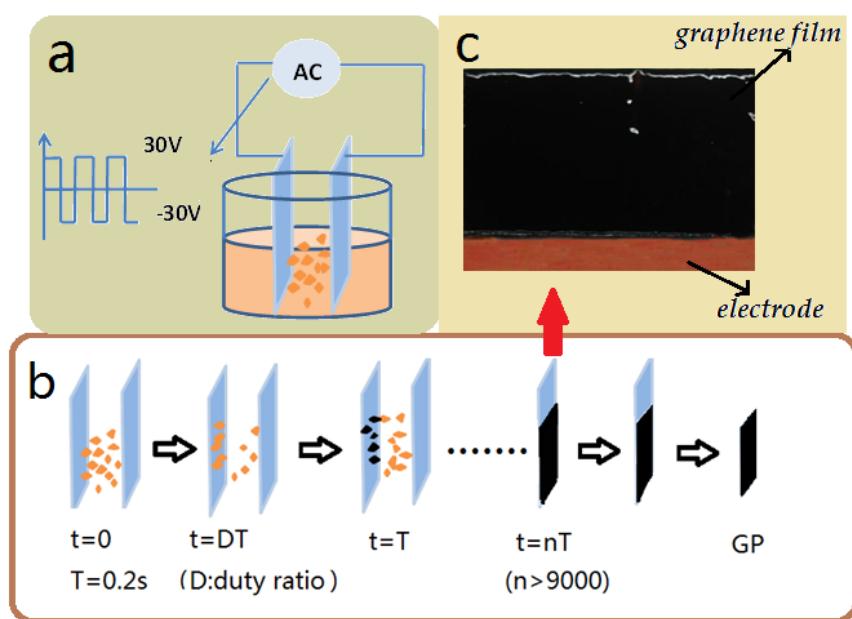

**SFig.1.** The setup of the electrochemical reaction process (a). Schematic illustration of the procedure for fabricating GP (b). Digital image of Cu electrode adsorbed graphene under 60% duty ratio for 3 h (c).

2. pulse wave

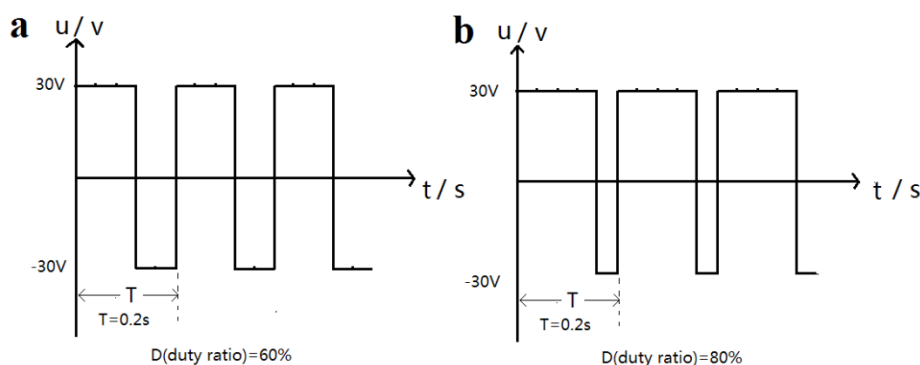

**SFig.2** positive and negative pulse wave used in this study with duty ratio 60% (a) 80% (b).

3

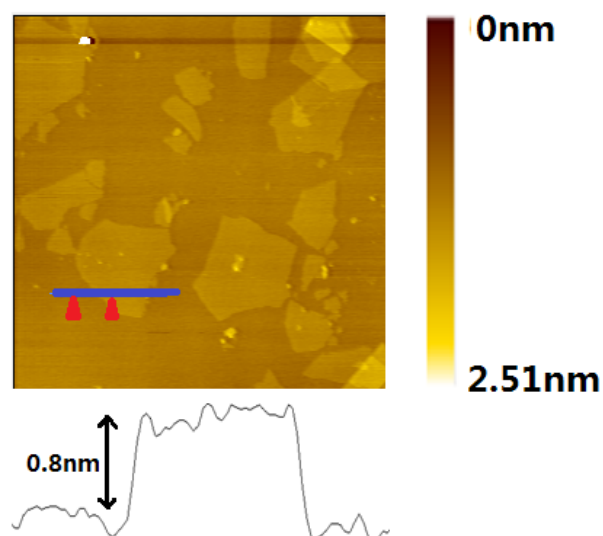

**SFig.3** Tapping mode AFM image of the GO on mica substrate.

Atomic force microscopy (AFM) image of graphene were obtained on a SPI3800N probe station operating. Sample was prepared by depositing GO dispersions on freshly cleaved micas and allowing them to air-dry.

4

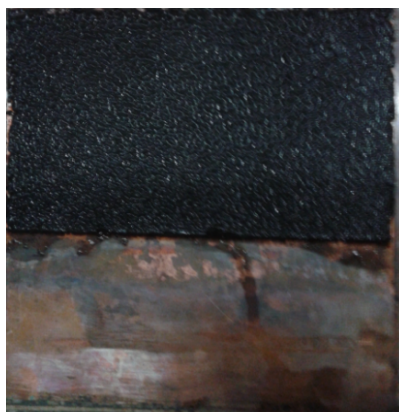

**SFig.4** Digital image of Cu electrode adsorbed graphene obtained in electrochemical by direct current voltage applied

5

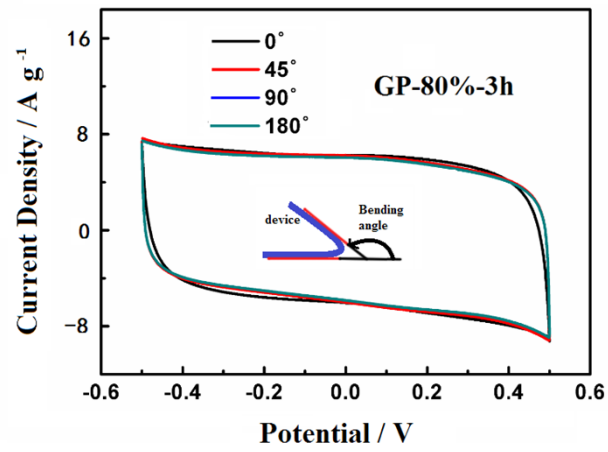

SFig.5 CV curves of device assembled by GP-80%-3h at a scan rate of  $100 \text{ mV s}^{-1}$  under different bending angles
